1 **An NCCN-IPI based immune-related gene**  
2 **prognostic model for diffuse large B-cell lymphoma**

3

4 Shidai Mu<sup>1,#,\*</sup>, Deyao Shi<sup>2,#</sup>, Lisha Ai<sup>1</sup>, Fengjuan Fan<sup>1</sup>, Fei Peng<sup>1</sup>, Chunyan Sun<sup>1\*</sup>, Yu Hu<sup>1\*</sup>

5

6

7 1 Institution of Hematology, Union Hospital, Tongji Medical College, Huazhong

8 University of Science and Technology, Wuhan, 430022, China

9 2 Department of Orthopaedics, Union Hospital, Tongji Medical College, Huazhong

10 University of Science and Technology, Wuhan, 430022, China

11 # equally contributed

12 \* Correspondence to: Shidai Mu, Chunyan Sun and Yu Hu

13

14

15 **Abstract**

16

17 **Background:** An enhanced International Prognostic Index (NCCN-IPI) was built to better discriminate  
18 diffuse large B-cell lymphoma (DLBCL) patients in the rituximab era. However, there is an urgent need to  
19 identify novel valuable biomarkers in the context of targeted therapies, such as immune checkpoint blockade  
20 (ICB) therapy.

21

22 **Methods:** Gene expression data and clinical information were obtained from The Cancer Genome Atlas  
23 (TCGA) and Gene Expression Omnibus (GEO) datasets. 73 immune-related hub genes in DLBCL patients  
24 with different IPI levels were identified by weighted gene co-expression network analysis (WGCNA), and 4  
25 genes were selected to construct an IPI-based immune-related prognostic model (IPI-IPM). Afterward, the  
26 genetic, somatic mutational and molecular profiles of IPI-IPM subgroups were analyzed, as well as the  
27 potential clinical response of ICB in different IPI-IPM subgroups.

28

29 **Results:** The IPI-IPM was constructed base on the expression of LCN2, CD5L, NLRP11 and SERPINB2,  
30 where high-risk patients had shorter overall survival (OS) than low-risk patients, consistent with the results  
31 in the GEO cohorts. The comprehensive results showed that a high IPI-IPM risk score was correlated with  
32 immune-related signaling pathways, high KMT2D and CD79B mutation rates, high infiltration of CD8+ T  
33 cells and macrophages (M1, M2), as well as up-regulation of inhibitory immune checkpoints including PD-  
34 L1, LAG3 and BTLA, indicating more potential response to ICB therapy.

35

36 **Conclusion:** The IPI-IPM has independent prognostic significance for DLBCL patients, which provides an  
37 immunological perspective to elucidate the mechanisms on tumor progression and drug resistance, also sheds  
38 a light on developing immunotherapy for DLBCL.

39

40 **Keywords:** DLBCL, NCCN-IPI, Immune prognostic model, Nomogram, Immunotherapy

41

42

## 43 **Introduction**

44 Diffuse large B-cell lymphoma (DLBCL) accounts for about 40% of non-Hodgkin B-cell lymphoma (NHL),  
45 usually presents with advanced stage, both in nodal and in extra-nodal symptomatic disease, with a median  
46 age of 60<sup>1, 2</sup>. Although current frontline DLBCL therapy (the standard R-CHOP chemotherapy regimen) is  
47 associated with a high complete response rates of 70–80%, 10% to 15% of DLBCL patients are refractory,  
48 and almost 40% of cases experience relapse within 2–3 years after initial response<sup>3, 4</sup>. An enhanced  
49 International Prognostic Index (NCCN-IPI) was built to better discriminate low- and high-risk subgroups in  
50 the rituximab era, which still needs to be further investigated on the robust capacity for risk stratification in  
51 the context of targeted therapies<sup>5, 6</sup>. Therefore, there is an urgent need to explore potential molecular  
52 mechanism and identify more key biomarkers and therapeutic targets.

53

54 Accumulating evidence has shed light on the prognostic role of tumor microenvironments (TME) in immune  
55 checkpoint blockade therapy (ICB), which was mostly composed of a variety of immune cells (T-, NK-, and  
56 B-cells as well as macrophages) and stroma (blood vessels and extra-cellular matrix)<sup>7-9</sup>. The TME in DLBCL  
57 could be categorized as “inflamed” (with two main subtypes: immune suppressed and immune evasion) and  
58 “non-inflamed” (“immune excluded”), which are not equally represented among cases of DLBCL, with the  
59 majority of DLBCLs in a “non-inflamed” landscape<sup>10, 11</sup>. Here, we applied Estimation of STromal and  
60 Immune cells in Malignant Tumors using Expression data (ESTIMATE) to investigate the fraction of stromal  
61 and immune cells in tumor samples using gene expression signature, which helps in elucidating the  
62 facilitating roles of TME to tumor initiation and progression<sup>12</sup>.

63

64 In this study, we identified immune-related hub genes in DLBCL patients with different IPI levels by  
65 weighted gene co-expression network analysis (WGCNA), and constructed an IPI-based immune-related  
66 prognostic model (IPI-IPM). We then characterized the genetic, somatic mutational and molecular profile of  
67 IPI-IPM subgroups, investigated the expression of several inhibitory immune checkpoints between low- and  
68 high-risk subgroups, and applied tumor immune dysfunction and exclusion (TIDE) and Immune Cell  
69 Abundance Identifier (ImmuCellAI) to roughly predict clinical response of ICB in different IPI-IPM  
70 subgroups. The results showed that IPI-IPM was a promising prognostic biomarker, which also had potential  
71 for use in patient management.

72

## 73 **Results**

### 74 **Identification of immune-related genes in DLBCL patients with different IPI levels**

75 A flowchart was diagramed to demonstrate the procedure and result of our study (**Figure 1**). Clinical  
76 information of 566 DLBCL patients were obtained from the TCGA database (TCGA-DLBC, CTSP-DLBCL1,  
77 NCICCR-DLBCL). Among DLBCL patients, 321 (56.71%) were male and 245 (43.29%) were female. Age  
78 of the patients at initial diagnosis ranged from 14 to 92 (median = 62). Other clinical characteristics including

79 follow-up period, Ann Arbor stages, LDH ratio, ECOG performance status, number of extranodal sites and  
80 therapy were all documented (**Supplementary material 1**). Because gene expression data was collected from  
81 3 projects, the principal component analysis was performed to show there was no obvious batch effect among  
82 the samples (**Figure S1A**). After excluding samples without IPI score or with IPI score crossing low/high  
83 groups (such as 1-5 or 2-3), 458 DLBCL patients were divided into low-IPI groups (n = 231, 112 at low risk  
84 (IPI = 0-1) and 119 at low-intermediate risk (IPI = 2)), and high-IPI groups (n = 227, 82 at high-intermediate  
85 risk (IPI = 3), 145 at high risk (IPI = 4-5)).

86 A total 2334 genes (713 up-regulated and 1621 down-regulated) were detected significantly differentially  
87 expressed in the RNA-Seq data (**Figure 2A-B and Supplementary material 2**). Besides, all genes with the  
88 top 50% variance among samples were included in WGCNA. All clinical characteristics were enrolled as  
89 trait variables, and the best  $\beta$  value in the co-expression network was calculated to be 9 (**Figure S2B**). Index  
90 for clustering of module eigengenes was modified to be 0.65, so as to construct reasonable number of merged  
91 modules (**Figure S2B**). As shown in the Module-trait relationship, 10 modules were significantly correlated  
92 with IPI group (**Figure 2C**), 6 modules (Tan, Lightcyan, Royalblue, Midnightblue, Skyblue3, Darkgreen)  
93 out of which were significantly associated with gene significance of IPI group (**Figures 2D**).  
94 Moreover, we collected 4686 immune-related genes in the combination with 6 independent databases  
95 (**Supplementary material 3**), and identified 73 genes as the IPI-based immune related genes for further  
96 analysis (**Figure S2C**).

97

## 98 **Construction and validation of an IPI-based immune-related prognostic model**

99 In the training cohort (n = 563), 21 out of the 73 genes were significantly correlated with OS in the univariate  
100 Cox regression analysis (**Supplementary material 4**). Next, we applied the Lasso penalized Cox regression  
101 to identify the optimal number of genes (n = 5) for risk score model (**Figure 3A-B**). As a result of stepwise  
102 multivariate Cox regression and AIC analysis, 4 out of 5 genes were selected to construct the most optimal  
103 IPI-based immune-related prognostic model (IPI-IPM) (**Figure 3C**). Risk score = (expression level of LCN2  
104 \* 0.001866 + expression level of CD5L \* 0.007183 + expression level of NLRP11 \* (-0.046541) + expression  
105 level of SERPINB2 \* 0.027145). According to the ROC curve of the median survival time, we identified  
106 1.07 as the cut-off value (**Figure S3A-B**). Then we calculated the risk score of each patient and divided them  
107 into high and low risk groups. As shown in **Figure 3D**, Kaplan-Meier survival analysis showed shorter OS  
108 of patients in the high-risk score group (log-rank P = 5.223e-06). The distribution of the risk score, survival  
109 status and the 4-gene expression levels between low- and high-risk score groups was shown in **Figure 3E**.  
110 As shown in the time-dependent ROC curves, AUCs were 0.694, 0.733, 0.705 for the 1, 3, 5-year, respectively  
111 (**Figure 3F**). With 1000 cycles of bootstrapping, the C-index of the risk score model was 0.65 (95% CI: 0.60-  
112 0.69, P = 1.87e-09). The results showed that IPI-IPM endowed a good capacity in OS prediction.  
113 Moreover, 335 patients with all available clinicopathologic parameters were enrolled for further analysis.  
114 The risk scores, along with age, LDH ratio and number of extranodal site were shown to be independent  
115 prognostic factors for OS (**Figure 4A**), which were integrated to construct a nomogram model showing IPI-

116 IPI-IPM with the highest risk points (ranging from 0 to 100, **Figure 4B**). As shown in **Figure 4C**, AUCs were  
117 0.875, 0.799, 0.808 and 0.837 for the 1, 3, 5-year and the median survival time, respectively. The C-index for  
118 the nomogram was 0.74 (95% CI: 0.689-0.796,  $P = 1.19e-18$ ). Moreover, the bias-corrected lines for the  
119 nomogram were shown close to the ideal line in 1,3,5-year and the median survival time periods (**Figure**  
120 **S3C**). As shown in the DCA analysis, the nomogram along with risk score from IPI-IPM showed relatively  
121 high net benefit (**Figure 4D**). Altogether, these results suggested that the nomogram had excellent capacity  
122 and consistency for OS prediction in the training cohort.

123 414 patients from GEO (GSE10846) with survival data and genome expression microarray data were enrolled  
124 for further validation of IPI-IPM. The risk score for each patient was calculated and all patients were divided  
125 into low and high risk score groups likewise. Kaplan-Meier survival analysis showed significantly shorter  
126 OS of patients in the high-risk score group (log-rank  $P = 0.003619$ , **Figure 4E**). And similar nomogram  
127 model was also constructed, presenting the risk scores as the major contributor. Likewise, relevant analyses  
128 were performed to evaluate the the capacity of IPI-IPM and nomogram model in OS prediction (**Figure S3D-**  
129 **I**). Taken the results of training and testing cohorts together, the nomogram combining IPI-IPM with clinical  
130 characteristics (age, LDH ratio and number of extranodal site) was an excellent model for predicting short-  
131 term or long-term OS in DLBCL patients, which might guide the therapeutic strategy decision and long-term  
132 prognosis follow-up.

133

### 134 **Immune related molecular characteristics of IPI-IPM subgroups**

135 As shown in the **Figure 5A**, Pearson correlation coefficient of every 2 genes from IPI-IPM was less than 0.1,  
136 suggesting that these 4 genes were independently expressed in DLBCL patients. Compared to the low-risk  
137 group, A total 3103 genes (1281 up-regulated and 1822 down-regulated) were detected significantly  
138 differentially expressed in the high-risk group (**Figure 5B-C and Supplementary material 5**). Additionally,  
139 t-SNE was applied to show an obvious genetic diversity between samples in the high- and low- risk groups  
140 (**Figure 5D**). The standard GSEA was performed to display that few gene sets were enriched in the high risk  
141 group. Details were all documented in **Figure S4 and Supplementary material 6**. Furthermore, GSVA  
142 was applied as the extension of GSEA to show that several immune related signaling pathways were significantly  
143 highly enriched in the high risk group (**Figure 5E**). Based on the somatic mutational data of 37 samples from  
144 TCGA, most mutations in low-risk group were missense mutation, while more nonsense mutations were  
145 identified in high-risk group (**Figure 6A**). Besides, the mutation frequency of top10 genes in high-risk group  
146 was much higher than that in low-risk group. Furthermore, we investigated specific mutation sites of key  
147 genes corresponding to their amino acids location, including KMT2D, CARD11, CD79B and KIRREL3  
148 (**Figure 6B**).

149 To gain further molecular insight into the immune characteristics of IPI-IPM, we selected 412 genes by  
150 intersecting DEGs with immune related gene sets. 79 genes correlating with risk scores were furthermore  
151 identified to be IPI-IPM associated immune genes (absolute Pearson correlation coefficient  $\geq 0.2$ ). Over  
152 representation analysis was applied to identify the enriched biological functions and pathways, such as humor

153 or mucosal immune response, and leukocyte or granulocyte chemotaxis (**Figure 7A-B**). Detailed results were  
154 listed in **Supplementary material 7**. Besides, a PPI network via the STRING database was built to identify  
155 top10 degree genes via the cytoscape cytoHubba plugin, including CXCL1, LCN2, SLPI, S100A7, LTF,  
156 SAA1, S100A12, CXCL5, CRISP3, and MUC7 (**Figure 7C**).

157

### 158 **Immune related TME characteristics of IPI-IPM subgroups**

159 With the ESTIMATE algorithm the immune scores of high risk group was significantly higher than low risk  
160 group, and there was no significant difference of the ESTIMATE scores or stromal scores between these 2  
161 IPI-IPM groups (**Figure 8A**). Additionally, CIBERSORT was applied to analyze the infiltrating abundances  
162 of various immune cell types in different IPI-IPM subgroups (**Figure 8B**). CD8<sup>+</sup> T cells, activated memory  
163 CD4<sup>+</sup> T cells, resting NK cells, and macrophages (M1, M2) were highly infiltrated in the high risk group,  
164 while regulatory T cells (Tregs), activated NK cells, non-activated macrophages (M0) and resting mast cells  
165 were more abundant in the low risk group (**Figure 8C**).

166 Moreover, by exploring the TIMER database for relationship between immune infiltration and gene  
167 expression/mutation, we found that expression of LCN2 was positively correlated with infiltrating of B cells,  
168 and the expression of NLRP11 was negatively correlated with infiltrating of Neutrophils (**Figure S5A**).  
169 Besides, there was significant correlation between the infiltration of B cells, Macrophages, and the copy  
170 number alteration (CNA) of CD5L, NLRP11 (**Figure S5B**).

171

### 172 **Immune checkpoint blockage response prediction of IPI-IPM subgroups**

173 The clinical development of cancer immunotherapies, along with advances in genomic analysis, has validated  
174 the important role of TME in predicting for sensitivity to immune checkpoint blockade therapy (ICB). We  
175 investigate the expression of several inhibitory immune checkpoints between high- and low-risk groups using  
176 TMM normalized counts data. As shown in **Figure 9A**, the expression of PD-L1, IDO-1, IDO-2 and LAG3  
177 were significantly up-regulated in high-risk group, as well as BTLA, VISTA, KIR2DL1, KIR2DL3,  
178 KIR2DS4.

179 We then used TIDE to assess the potential clinical efficacy of immunotherapy in different IPI-IPM subgroups,  
180 where higher TIDE prediction score (based on T cell dysfunction and T cell exclusion) represented higher  
181 potential for immune evasion, thus less benefit from ICB. As shown in **Figure 9B**, the high-risk group was  
182 correlated with a lower T cell exclusion score, lower FAP<sup>+</sup> CAFs, and higher IFN- $\gamma$ . Furthermore, we used  
183 another bioinformatic tool based on ssGSEA - ImmuCellAI to predict the abundance of critical TILs that  
184 related to the response to immunotherapy. There were more cytotoxic CD8<sup>+</sup> T cells (CTL) and mucosal-  
185 associated invariant T cells (MAIT), but less exhausted CD8<sup>+</sup> T cells, natural and induced Tregs in high-risk  
186 groups (**Figure 9C**).

187

188

## 189 Discussion

190 Recent groundbreaking insights into the pronounced genomic heterogeneity of DLBCL have identified  
191 potential biomarkers for patient diagnosis, prognostication, and therapy, paving the way for a standardized  
192 application of precision medicine<sup>1, 3, 4, 6, 13, 14</sup>. The enhanced NCCN-IPI was built to stratify prognostically  
193 relevant subgroups of DLBCL patients with R-CHOP therapy, the robustness of which however needs to be  
194 further investigated in the context of targeted therapies and novel biomarkers. In the current study, we used  
195 WGCNA to profile IPI-based immune-related gene set and constructed a 4-gene IPI-IPM (SERPINB2, CD5L,  
196 LCN2 and NLRP11), with shorter OS in high-risk patients and longer OS in low-risk patients in both TCGA  
197 and GEO cohorts.

198  
199 SerpinB2 belongs to a superfamily of serpins, which has diverse roles in cancer development and metastasis  
200 via ECM remodeling<sup>15</sup>. SerpinB2 has been shown to be associated with the survival in various cancer types  
201 including lung, breast, bladder, colorectal, and ovarian cancers<sup>15</sup>. Besides, SerpinB2 is upregulated in  
202 activated macrophages, monocytes, and fibroblasts, also exerting a protective effect on the TCDD-mediated  
203 immunosuppression of the B cells<sup>16</sup>. CD5-like protein (CD5L) is a secreted glycoprotein mainly from  
204 macrophages, which involves in infection, atherosclerosis, and cancer by regulating inflammatory  
205 responses<sup>17</sup>. Sanjurjo et al. have demonstrated that CD5L drives macrophage polarization toward an anti-  
206 inflammatory and pro-resolving phenotype. Moreover, CD5L has been shown to enhance the proliferation of  
207 liver cancer cells and protect them from cisplatin-induced apoptosis, consistent with elevated CD5L  
208 expression favoring worse prognosis<sup>18</sup>. Lipocalin-2 (LCN2) is a secreted glycoprotein of the adipokine  
209 superfamily, dysregulation of which has been tied to obesity, metabolic syndrome, cardiovascular diseases,  
210 and cancer<sup>19</sup>. Several studies have revealed elevated LCN2 expression in multiple cancers, and correlated  
211 LCN2 overexpression with the progression and poor prognosis of breast, gastric, and pancreatic cancer.  
212 Additionally, Gomez-Chou et al. firstly showed that LCN2 modulated pro-inflammatory factors production  
213 in pancreatic stromal cells and reduced macrophages infiltration in the stroma of pancreatic ductal  
214 adenocarcinoma (PDAC)<sup>20</sup>. NLRP11, a primate-specific member of the NOD-like receptor (NLR), is highly  
215 expressed in the testes, ovaries, lungs and other various tissues, with the important role in both development  
216 and immune regulation<sup>21</sup>. Ellwanger et al. reported that NLRP11 is expressed in a panel of immune cells and  
217 functions as a negative regulator of inflammatory responses by inhibiting NF- $\kappa$ B and IFN pathways.  
218 Furthermore, the differential expression of NLRP11 in B cell lymphoma lines and cancer entities suggested  
219 the potential role of NLRP11 in the malignant transformation process.

220  
221 Additionally, we demonstrated that the risk score remained an independent prognostic factor after the  
222 modification of clinical characteristics, suggesting the promising potential of local immune status in accurate  
223 prognosis. Therefore, we developed a nomogram model combining the risk score and other clinical features  
224 (age, LDH ratio and number of extranodal site), to predict OS probability of DLBCL patients in 1-, 3- and 5-  
225 year and the median survival time, respectively. And the calibration curve showed satisfactory agreement

226 between the observed values and the predicted values in 1-, 3-, 5-year and the median survival time periods.  
227 The result of DCA analysis also presented the nomogram with relatively high net benefit. Moreover, our  
228 nomogram provides a complementary perspective on individualizing tumors and develops an individual  
229 scoring system for patients, thus arising to be a promising tool for clinicians in the future.

230

231 The overall somatic mutational profile showed more nonsense mutations in high-risk group, and the largest  
232 difference in mutations was KMT2D (43.75% in the high risk samples vs. 19.05% in the low risk samples).  
233 KMT2D is a tumor suppressor gene in DLBCL and genetic ablation of KMT2D in a BCL2-overexpression  
234 driven model of B-cell lymphoma promotes a higher penetrance of DLBCL<sup>22</sup>. Additionally, higher mutation  
235 frequency of CD79B was found in the high risk group, indicating that high-risk DLBCLs promote  
236 proliferation through chronic active B-cell receptor (BCR) signaling and NF- $\kappa$ B constitutive activation<sup>23</sup>.  
237 Therefore, high-risk DLBCL patients with high KMT2D and CD79B mutations have a worse outcome, in  
238 agreement with our survival results.

239

240 In the GSEA analysis between the low and high risk group patients, few immune-related gene sets, such as  
241 immune response, cytokine/chemokine signaling, and NOD-like receptor signaling pathway, were enriched  
242 for the high-risk group, but not in the low-risk group. Therefore, we speculated that the local immune  
243 signature conferred an intense immune phenotype in the high-risk group and a weaker immune phenotype in  
244 the low risk group. Moreover, 79 immune-related DEGs correlating with risk scores were identified as IPI-  
245 IPM associated immune genes sets. Several immune-related pathways including immune response and  
246 chemotaxis were enriched, and top10 degree genes such as CXCL1, CXCL5, LCN2, S100A7, and MUC7,  
247 were identified through a PPI network via the STRING database.

248

249 Moreover, we evaluated the tumor purity and immune/stromal cells infiltration where the immune scores of  
250 high-risk group was significantly higher than that of low-risk group. Additionally, the composition of some  
251 immune cells was different between two IPI-IPM subgroups, where CD8+ T cells and macrophages (M1,  
252 M2) were highly infiltrated in high-risk group, while regulatory T cells (Tregs) and non-activated  
253 macrophages (M0) were more abundant in the low-risk group. Several studies have reported an inferior effect  
254 of tumor-infiltrating cytotoxic cells on the outcome in DLBCL, the reason for which is that malignant cells  
255 with high CD8+ T cells infiltration might be more resistant to cell-mediated killing, and these T cells might  
256 be in a dysfunctional state, thus inducing immune suppression<sup>8,9</sup>. Also, an increase in the M2 component of  
257 TAM has been shown to correlate with a poor prognosis in DLBCL, where M2 macrophages demonstrates a  
258 high rate of PD-L1 expression, likely allowing tumor cells to escape immune control.

259

260 Next, we explored the expression of several inhibitory immune checkpoints between IPI-IPM subgroups so  
261 as to predict the response for immunotherapy, where the expression of PD-L1, LAG3 and BTLA were  
262 significantly up-regulated in high-risk group. Although PD-L1 expression was shown to correlate with



263 clinical response to PD-1 blockade and prognosis in solid tumors, the expression patterns of PD-1 and PD-  
264 L1 are complex and variable in lymphoid malignancies<sup>24, 25</sup>. Kim et al. has found that high tumoral PD-L1  
265 expression is associated with poor prognosis in primary DLBCL of the central nervous system<sup>26</sup>.  
266 Combination with PD-L1 blockade, other immune checkpoint inhibitors, such as CTLA4, TIM3, LAG3, and  
267 BTLA, have emerged as the novel strategy for lymphoma immunotherapy<sup>10, 27</sup>. Keane et al. has reported the  
268 co-expression of LAG3 with PD-1 and TIM-3 on CD4<sup>+</sup> Tregs and CD8<sup>+</sup> TILs, and high LAG3 expression  
269 is associated with poor outcome of DLBCL patients<sup>28</sup>. Therefore, the risk score from our model was  
270 compatible with the ability of tumor-infiltrating immune cells to determine the expression of immune  
271 checkpoints, suggesting that the poor prognosis of high-risk group may be due to the stronger  
272 immunosuppressive TME, and high-risk patients will benefit more from immune checkpoint inhibitors than  
273 low-risk patients, thereby resulting in a better prognosis.

274

275 Furthermore, we used TIDE to assess the potential clinical efficacy of immunotherapy in different IPI-IPM  
276 subgroups, where higher TIDE prediction score (based on T cell dysfunction and T cell exclusion) represented  
277 higher potential for immune evasion, thus less benefit from ICB. In our study, there is no significant  
278 difference on TIDE score and T cells dysfunction between these 2 subgroups, while the high-risk group was  
279 correlated with a lower T cell exclusion score (using MDSC, M2-TAM and CAF gene signature). Additionally,  
280 ImmuCellAI was applied to show more CD8<sup>+</sup> CTLs, but less exhausted CD8<sup>+</sup> T cells and Tregs in high-risk  
281 groups. The complex immune-escape mechanisms in DLBCL may be the most important reason for the  
282 inconsistent results compared to that in most solid tumor data sets<sup>2, 3, 10, 11</sup>. Besides, Muris et al. has found  
283 that a high percentage of activated CTLs is a strong indicator for an unfavorable clinical outcome in patients  
284 with primary nodal DLBCL<sup>29</sup>. Also, more samples are warranted to further validation.

285

286 Our research provides new insights into the TME and immune-related therapies for DLBCL. However, it is  
287 noteworthy that some limitations came out because the conclusion was drawn from data from retrospective  
288 studies, and prospective studies are warranted to further confirm our results. In addition, functional and  
289 mechanistic studies of the genes in our risk model should be conducted to support their clinical application.

290

## 291 **Materials and Methods**

### 292 **Data selection and acquisition**

293 The study reported herein fully satisfies the TCGA publication requirements  
294 (<http://cancergenome.nih.gov/publications/publicationguidelines>). Gene expression data and the  
295 corresponding clinical data for DLBCL samples (Project: TCGA-DLBC, CTSP-DLBCL1, NCICCR-DLBCL)  
296 were acquired from the Cancer Genome Atlas (TCGA) website (<https://portal.gdc.cancer.gov/repository>)  
297 through the TCGAblinks<sup>30</sup> R package in R software (version 4.0.2, <https://www.r-project.org>) and Rstudio  
298 software (Version 1.3.1073, <https://rstudio.com>). Among them, available gene expression quantification data  
299 of 570 samples were downloaded using the Illumina HTSeq-Counts and HTSeq-FPKM workflow types. The

300 latest Homo\_sapiens.GRCh38.101.chr.gtf file (<https://www.ensembl.org>) was used for gene symbol  
301 annotation. The trimmed mean of M values (TMM) method was applied for the normalization of downloaded  
302 gene expression data by using the edgeR R package<sup>31</sup>. Sequencing data of low abundance were eliminated.

### 303 **The Principal components analysis**

304 The Principal components analysis<sup>32</sup> for samples of different projects was performed and visualized by using  
305 the psych and factoextra packages of R.

### 306 **Identification of differentially expressed genes**

307 458 samples were divided to two groups according to IPI scores, and the edgeR R package<sup>31</sup> was applied to  
308 identify differentially expressed genes (DEGs) between high- and low- IPI groups. The differential  
309 expression was defined with a  $|\log_2 \text{fold-change (FC)}| > 1$  and the false discovery rate (FDR) value  $< 0.01$ .

### 310 **Gene functional enrichment analysis**

311 The clusterProfiler R package<sup>33</sup> was used for both over representation analysis and gene set enrichment  
312 analysis. Analysis of Gene Ontology (GO)<sup>34</sup>, Kyoto Encyclopedia of Genes and Genomes (KEGG) pathway<sup>35</sup>,  
313 and Reactome pathway<sup>36</sup> was contained in the present study.  $P < 0.05$  was considered statistically  
314 significance. The standard gene set enrichment analysis was performed by using the normalized counts data  
315 via the GSEA software (<http://software.broadinstitute.org/gsea>). The threshold for GSEA was set at the  
316 nominal p-value  $< 0.05$ , FDR  $< 0.25$  and  $|\text{normalized enrichment score (NES)}| > 1.0$ . The non-parametric  
317 gene set variation analysis was further performed with the GSVA package of R. The annotated Hallmark  
318 gene sets, Canonical pathways gene sets (KEGG and Reactome) and Ontology gene sets (GO biological  
319 process) were selected as the reference gene sets.

### 320 **Weighted gene co-expression network analysis**

321 Weighted gene co-expression network analysis (WGCNA)<sup>37, 38</sup> is commonly used for analyzing high-  
322 throughput gene expression data with different characteristics, so as to mine gene co-expression networks  
323 and intramodular hub genes based on pairwise correlations in genomic applications. In the present study, we  
324 applied the WGCNA R package<sup>38</sup> to analyze key gene clusters that were most relevant to IPI scores in  
325 DLBCL samples.

### 326 **Construction and validation of IPI-based immune-related prognostic model (IPI-IPM)**

327 73 IPI-based immune related genes were selected to construct the prognostic risk model. The training cohort  
328 (563 samples from TCGA) was used for the construction of IPI-IPM, while the testing cohort (414 patients  
329 from Gene Expression Omnibus (GEO), GSE10846) was used for external validation. The Survival R  
330 package was utilized to analyze the correlation between the expression of objective gene sets and DLBCL  
331 patients' overall survival (OS). The univariate Cox regression analysis was used to screen genes with  $P <$   
332  $0.05$ . Lasso (least absolute shrinkage and selection operator) regression analysis was applied for variable  
333 selection and regularization to enhance the prediction accuracy and interpretability<sup>39</sup>. Then the multivariate  
334 Cox regression analysis was carried out to select the optimal gene sets, according to the method of Akaike  
335 information criterion (AIC)<sup>40</sup>. For each sample, the risk score = SUM (the normalized expression level of

336 each gene \* the corresponding regression coefficient).  
337 563 DLBCL patients in the training cohort were divided to low- and high- risk score groups according to the  
338 cut-off value identified in the receiver operating characteristic (ROC) curve of the median survival time.  
339 Then, Kaplan-Meier survival analysis and time-dependent ROC curve analysis were performed to evaluate  
340 the prognostic significance and accuracy of IPI-IPM. Besides, Harrell's concordance index (C-index) was  
341 calculated by using the survcomp R package<sup>41</sup>.

342 The univariate and multivariate Cox regression analyses were performed on the risk score and all available  
343 clinicopathologic parameters, such as age, gender, Ann Arbor clinical stage, LDH ratio, ECOG performance  
344 status, number of extranodal site. Then, all independent prognostic factors were retained to construct a  
345 prognostic nomogram for OS probability assessment by using the rms and mstate R packages<sup>42</sup>. The  
346 discriminative efficacy, consistency and clinical judgment utility of the nomogram was evaluated by time-  
347 dependent ROC curve<sup>43</sup>, C-index, time-dependent Calibration plots, and decision curve analysis (DCA) using  
348 the rmda R package<sup>44</sup>. As for the external validation, all above methods were used to evaluate the prognostic  
349 model and nomogram in the testing cohort.

### 350 **Comprehensive analysis of molecular and immune characteristics in different IPI-** 351 **IPM subgroups**

352 DEGs between high and low risk score groups were analyzed following the criteria of  $|\log_2FC| > 1$  and FDR  
353 value  $< 0.01$ . The gene expression of samples between IPI-IPM subgroups were analyzed with the t-  
354 distributed stochastic neighbor embedding (t-SNE)<sup>45</sup> method by using the Rtsne package of R and then  
355 visualized on the 3D map with the scatterplot3d package of R. And the quantity and quality of gene mutations  
356 were analyzed in IPI-IPM subgroups by using the Maftools R package<sup>46</sup>. The intersection of DEGs and  
357 immune related gene set was used to construct a protein-protein interaction (PPI) network<sup>47</sup> based on the  
358 STRING database<sup>48</sup>, and the Cytoscape plugin cytoHubba was utilized to identify top10 degree genes in the  
359 network<sup>49</sup>.

360 The ESTIMATE algorithm (Estimation of Stromal and Immune cells in Malignant Tumor tissues using  
361 Expression data)<sup>12</sup>, a bioinformatic tool for assessing tumor purity and stromal/immune cells infiltration in  
362 tumor tissues, was used to calculate the corresponding infiltrating scores of the 570 DLBCL samples in the  
363 present study. Besides, the gene expression data of 570 DLBCL samples were imported into CIBERSORT  
364 ([HTTPS://cibersort.stanford.edu/](https://cibersort.stanford.edu/))<sup>50</sup> and iterated 1000 times to estimate the relative proportion of 22 types of  
365 immune cells. The TIMER database<sup>51</sup> was explored to evaluate the correlation between immune infiltration  
366 and critical gene expression/mutation. TIDE<sup>52</sup> and immuneAI<sup>53</sup> were explored to assess the potential clinical  
367 efficacy of immunotherapy in different IPI-IPM subgroups.

### 368 **Data Analysis**

369 All statistical data was analyzed in the R software (version 4.0.2. An independent t-test was applied to  
370 compare continuous variables between two groups. Immune scores calculated via ESTIMATE between  
371 groups were compared by the Wilcoxon test). Statistical tests were two-tailed with statistical significance  
372 level set at  $P < 0.05$ .

373

374 **Acknowledgements**

375 Not applicable

376

377 **Author contributions**

378 SM, DS, CS and YH conceived and designed the study. SM and DS did the literature research, performed  
379 study selection, data extraction, statistical analysis and wrote the draft. LA, FF and FP participated in the  
380 extraction and analysis of data. All the authors read and approved the final version of the manuscript.

381

382 **Conflict of interest**

383 The authors declare that there is no conflict of interest.

384

385 **Funding**

386 This work was supported by grants from the National Natural Science Foundation of China (No. 81974007  
387 to Chunyan Sun) and the National Key R&D Program of China (Grant No 2019YFC1316204 to Yu Hu).

388

389 **Data Availability Statement**

390 The datasets used and/or analyzed during the current study are available from the corresponding author on  
391 reasonable request.

392

393

394

## 395 References

- 396 1. Pasqualucci, L, and Dalla-Favera, R (2018). Genetics of diffuse large B-cell lymphoma. *Blood* **131**:  
397 2307-2319.
- 398 2. Solimando, AG, Annese, T, Tamma, R, Ingravallo, G, Maiorano, E, Vacca, A, Specchia, G, and Ribatti,  
399 D (2020). New Insights into Diffuse Large B-Cell Lymphoma Pathobiology. *Cancers (Basel)* **12**.
- 400 3. El Hussein, S, Shaw, KRM, and Vega, F (2020). Evolving insights into the genomic complexity and  
401 immune landscape of diffuse large B-cell lymphoma: opportunities for novel biomarkers. *Mod*  
402 *Pathol* **33**: 2422-2436.
- 403 4. Wang, L, Li, LR, and Young, KH (2020). New agents and regimens for diffuse large B cell lymphoma.  
404 *J Hematol Oncol* **13**: 175.
- 405 5. Zhu, Z, Jin, Z, Zhang, H, Zhang, M, and Sun, D (2020). Integrative Clustering Reveals a Novel Subtype  
406 of Soft Tissue Sarcoma With Poor Prognosis. *Frontiers in genetics* **11**: 69.
- 407 6. Wight, JC, Chong, G, Grigg, AP, and Hawkes, EA (2018). Prognostication of diffuse large B-cell  
408 lymphoma in the molecular era: moving beyond the IPI. *Blood Rev* **32**: 400-415.
- 409 7. Ciavarella, S, Vegliante, MC, Fabbri, M, De Summa, S, Melle, F, Motta, G, De Iuliis, V, Opinto, G,  
410 Enjuanes, A, Rega, S, *et al.* (2018). Dissection of DLBCL microenvironment provides a gene  
411 expression-based predictor of survival applicable to formalin-fixed paraffin-embedded tissue. *Ann*  
412 *Oncol* **29**: 2363-2370.
- 413 8. Hopken, UE, and Rehm, A (2019). Targeting the Tumor Microenvironment of Leukemia and  
414 Lymphoma. *Trends Cancer* **5**: 351-364.
- 415 9. Autio, M, Leivonen, SK, Bruck, O, Mustjoki, S, Jorgensen, JM, Karjalainen-Lindsberg, ML, Beiske, K,  
416 Holte, H, Pellinen, T, and Leppa, S (2020). Immune cell constitution in the tumor microenvironment  
417 predicts the outcome in diffuse large B-cell lymphoma. *Haematologica*.
- 418 10. Xu-Monette, ZY, Xiao, M, Au, Q, Padmanabhan, R, Xu, B, Hoe, N, Rodriguez-Perales, S, Torres-Ruiz,  
419 R, Manyam, GC, Visco, C, *et al.* (2019). Immune Profiling and Quantitative Analysis Decipher the  
420 Clinical Role of Immune-Checkpoint Expression in the Tumor Immune Microenvironment of DLBCL.  
421 *Cancer Immunol Res* **7**: 644-657.
- 422 11. Kline, J, Godfrey, J, and Ansell, SM (2020). The immune landscape and response to immune  
423 checkpoint blockade therapy in lymphoma. *Blood* **135**: 523-533.
- 424 12. Yoshihara, K, Shahmoradgoli, M, Martínez, E, Vegesna, R, Kim, H, Torres-Garcia, W, Treviño, V, Shen,  
425 H, Laird, PW, Levine, DA, *et al.* (2013). Inferring tumour purity and stromal and immune cell  
426 admixture from expression data. *Nature communications* **4**: 2612.
- 427 13. Zhou, M, Zhao, H, Xu, W, Bao, S, Cheng, L, and Sun, J (2017). Discovery and validation of immune-  
428 associated long non-coding RNA biomarkers associated with clinically molecular subtype and  
429 prognosis in diffuse large B cell lymphoma. *Mol Cancer* **16**: 16.
- 430 14. Tian, L, He, Y, Zhang, H, Wu, Z, Li, D, and Zheng, C (2018). Comprehensive analysis of differentially  
431 expressed profiles of lncRNAs and mRNAs reveals ceRNA networks in the transformation of diffuse  
432 large B-cell lymphoma. *Oncol Lett* **16**: 882-890.
- 433 15. Ramnefjell, M, Aamelfot, C, Helgeland, L, and Akslen, LA (2017). Low expression of SerpinB2 is  
434 associated with reduced survival in lung adenocarcinomas. *Oncotarget* **8**: 90706-90718.
- 435 16. Dornbos, P, Warren, M, Crawford, RB, Kaminski, NE, Threadgill, DW, and LaPres, JJ (2018).  
436 Characterizing Serpinb2 as a Modulator of TCDD-Induced Suppression of the B Cell. *Chem Res*  
437 *Toxicol* **31**: 1248-1259.
- 438 17. Sanjurjo, L, Aran, G, Tellez, E, Amezaga, N, Armengol, C, Lopez, D, Prats, C, and Sarrias, MR (2018).  
439 CD5L Promotes M2 Macrophage Polarization through Autophagy-Mediated Upregulation of ID3.  
440 *Front Immunol* **9**: 480.
- 441 18. Aran, G, Sanjurjo, L, Barcena, C, Simon-Coma, M, Tellez, E, Vazquez-Vitali, M, Garrido, M, Guerra, L,  
442 Diaz, E, Ojanguren, I, *et al.* (2018). CD5L is upregulated in hepatocellular carcinoma and promotes  
443 liver cancer cell proliferation and antiapoptotic responses by binding to HSPA5 (GRP78). *FASEB J* **32**:  
444 3878-3891.
- 445 19. Santiago-Sanchez, GS, Pita-Grisanti, V, Quinones-Diaz, B, Gumpper, K, Cruz-Monserrate, Z, and  
446 Vivas-Mejia, PE (2020). Biological Functions and Therapeutic Potential of Lipocalin 2 in Cancer. *Int*

- 447 *J Mol Sci* **21**.
- 448 20. Gomez-Chou, SB, Swidnicka-Siergiejko, AK, Badi, N, Chavez-Tomar, M, Lesinski, GB, Bekaii-Saab, T,  
449 Farren, MR, Mace, TA, Schmidt, C, Liu, Y, *et al.* (2017). Lipocalin-2 Promotes Pancreatic Ductal  
450 Adenocarcinoma by Regulating Inflammation in the Tumor Microenvironment. *Cancer Res* **77**:  
451 2647-2660.
- 452 21. Ellwanger, K, Becker, E, Kienes, I, Sowa, A, Postma, Y, Cardona Gloria, Y, Weber, ANR, and Kufer, TA  
453 (2018). The NLR family pyrin domain-containing 11 protein contributes to the regulation of  
454 inflammatory signaling. *The Journal of biological chemistry* **293**: 2701-2710.
- 455 22. Saffie, R, Zhou, N, Rolland, D, Onder, O, Basrur, V, Campbell, S, Wellen, KE, Elenitoba-Johnson, KSJ,  
456 Capell, BC, and Busino, L (2020). FBXW7 Triggers Degradation of KMT2D to Favor Growth of Diffuse  
457 Large B-cell Lymphoma Cells. *Cancer Res* **80**: 2498-2511.
- 458 23. Takeuchi, T, Yamaguchi, M, Kobayashi, K, Miyazaki, K, Tawara, I, Imai, H, Ono, R, Nosaka, T, Tanaka,  
459 K, and Katayama, N (2017). MYD88, CD79B, and CARD11 gene mutations in CD5-positive diffuse  
460 large B-cell lymphoma. *Cancer* **123**: 1166-1173.
- 461 24. Xu-Monette, ZY, Zhou, J, and Young, KH (2018). PD-1 expression and clinical PD-1 blockade in B-cell  
462 lymphomas. *Blood* **131**: 68-83.
- 463 25. Xie, M, Huang, X, Ye, X, and Qian, W (2019). Prognostic and clinicopathological significance of PD-  
464 1/PD-L1 expression in the tumor microenvironment and neoplastic cells for lymphoma.  
465 *International immunopharmacology* **77**: 105999.
- 466 26. Kim, S, Nam, SJ, Park, C, Kwon, D, Yim, J, Song, SG, Ock, CY, Kim, YA, Park, SH, Kim, TM, *et al.* (2019).  
467 High tumoral PD-L1 expression and low PD-1(+) or CD8(+) tumor-infiltrating lymphocytes are  
468 predictive of a poor prognosis in primary diffuse large B-cell lymphoma of the central nervous  
469 system. *Oncoimmunology* **8**: e1626653.
- 470 27. Chen, BJ, Dashnamoorthy, R, Galera, P, Makarenko, V, Chang, H, Ghosh, S, and Evens, AM (2019).  
471 The immune checkpoint molecules PD-1, PD-L1, TIM-3 and LAG-3 in diffuse large B-cell lymphoma.  
472 *Oncotarget* **10**: 2030-2040.
- 473 28. Keane, C, Law, SC, Gould, C, Birch, S, Sabdia, MB, Merida de Long, L, Thillaiyampalam, G, Abro, E,  
474 Tobin, JW, Tan, X, *et al.* (2020). LAG3: a novel immune checkpoint expressed by multiple lymphocyte  
475 subsets in diffuse large B-cell lymphoma. *Blood Adv* **4**: 1367-1377.
- 476 29. Muris, JJ, Meijer, CJ, Cillessen, SA, Vos, W, Kummer, JA, Bladergroen, BA, Bogman, MJ, MacKenzie,  
477 MA, Jiwa, NM, Siegenbeek van Heukelom, LH, *et al.* (2004). Prognostic significance of activated  
478 cytotoxic T-lymphocytes in primary nodal diffuse large B-cell lymphomas. *Leukemia* **18**: 589-596.
- 479 30. Colaprico, A, Silva, TC, Olsen, C, Garofano, L, Cava, C, Garolini, D, Sabedot, TS, Malta, TM, Pagnotta,  
480 SM, Castiglioni, I, *et al.* (2016). TCGAAbiolinks: an R/Bioconductor package for integrative analysis of  
481 TCGA data. *Nucleic acids research* **44**: e71.
- 482 31. Robinson, MD, McCarthy, DJ, and Smyth, GK (2010). edgeR: a Bioconductor package for differential  
483 expression analysis of digital gene expression data. *Bioinformatics (Oxford, England)* **26**: 139-140.
- 484 32. Groth, D, Hartmann, S, Klie, S, and Selbig, J (2013). Principal components analysis. *Methods in*  
485 *molecular biology (Clifton, NJ)* **930**: 527-547.
- 486 33. Yu, G, Wang, LG, Han, Y, and He, QY (2012). clusterProfiler: an R package for comparing biological  
487 themes among gene clusters. *Omics : a journal of integrative biology* **16**: 284-287.
- 488 34. (2019). The Gene Ontology Resource: 20 years and still GOing strong. *Nucleic acids research* **47**:  
489 D330-d338.
- 490 35. Ogata, H, Goto, S, Sato, K, Fujibuchi, W, Bono, H, and Kanehisa, M (1999). KEGG: Kyoto Encyclopedia  
491 of Genes and Genomes. *Nucleic acids research* **27**: 29-34.
- 492 36. Fabregat, A, Jupe, S, Matthews, L, Sidiropoulos, K, Gillespie, M, Garapati, P, Haw, R, Jassal, B,  
493 Korninger, F, May, B, *et al.* (2018). The Reactome Pathway Knowledgebase. *Nucleic acids research*  
494 **46**: D649-d655.
- 495 37. Maertens, A, Tran, V, Kleensang, A, and Hartung, T (2018). Weighted Gene Correlation Network  
496 Analysis (WGCNA) Reveals Novel Transcription Factors Associated With Bisphenol A Dose-Response.  
497 *Frontiers in genetics* **9**: 508.
- 498 38. Langfelder, P, and Horvath, S (2008). WGCNA: an R package for weighted correlation network  
499 analysis. *BMC bioinformatics* **9**: 559.

- 
- 500 39. Steyerberg, EW, Vickers, AJ, Cook, NR, Gerds, T, Gonen, M, Obuchowski, N, Pencina, MJ, and Kattan,  
501 MW (2010). Assessing the performance of prediction models: a framework for traditional and novel  
502 measures. *Epidemiology (Cambridge, Mass)* **21**: 128-138.
- 503 40. Yamaoka, K, Nakagawa, T, and Uno, T (1978). Application of Akaike's information criterion (AIC) in  
504 the evaluation of linear pharmacokinetic equations. *Journal of pharmacokinetics and*  
505 *biopharmaceutics* **6**: 165-175.
- 506 41. Schröder, MS, Culhane, AC, Quackenbush, J, and Haibe-Kains, B (2011). survcomp: an  
507 R/Bioconductor package for performance assessment and comparison of survival models.  
508 *Bioinformatics (Oxford, England)* **27**: 3206-3208.
- 509 42. de Wreede, LC, Fiocco, M, and Putter, H (2010). The mstate package for estimation and prediction  
510 in non- and semi-parametric multi-state and competing risks models. *Computer methods and*  
511 *programs in biomedicine* **99**: 261-274.
- 512 43. Heagerty, PJ, Lumley, T, and Pepe, MS (2000). Time-dependent ROC curves for censored survival  
513 data and a diagnostic marker. *Biometrics* **56**: 337-344.
- 514 44. Tataranni, T, and Piccoli, C (2019). Dichloroacetate (DCA) and Cancer: An Overview towards Clinical  
515 Applications. *Oxidative medicine and cellular longevity* **2019**: 8201079.
- 516 45. Cieslak, MC, Castelfranco, AM, Roncalli, V, Lenz, PH, and Hartline, DK (2020). t-Distributed  
517 Stochastic Neighbor Embedding (t-SNE): A tool for eco-physiological transcriptomic analysis.  
518 *Marine genomics* **51**: 100723.
- 519 46. Mayakonda, A, Lin, DC, Assenov, Y, Plass, C, and Koeffler, HP (2018). Maftools: efficient and  
520 comprehensive analysis of somatic variants in cancer. *Genome research* **28**: 1747-1756.
- 521 47. Bader, GD, and Hogue, CW (2003). An automated method for finding molecular complexes in large  
522 protein interaction networks. *BMC bioinformatics* **4**: 2.
- 523 48. Szklarczyk, D, Morris, JH, Cook, H, Kuhn, M, Wyder, S, Simonovic, M, Santos, A, Doncheva, NT, Roth,  
524 A, Bork, P, *et al.* (2017). The STRING database in 2017: quality-controlled protein-protein  
525 association networks, made broadly accessible. *Nucleic acids research* **45**: D362-d368.
- 526 49. Shannon, P, Markiel, A, Ozier, O, Baliga, NS, Wang, JT, Ramage, D, Amin, N, Schwikowski, B, and  
527 Ideker, T (2003). Cytoscape: a software environment for integrated models of biomolecular  
528 interaction networks. *Genome research* **13**: 2498-2504.
- 529 50. Chen, B, Khodadoust, MS, Liu, CL, Newman, AM, and Alizadeh, AA (2018). Profiling Tumor  
530 Infiltrating Immune Cells with CIBERSORT. *Methods in molecular biology (Clifton, NJ)* **1711**: 243-  
531 259.
- 532 51. Li, T, Fu, J, Zeng, Z, Cohen, D, Li, J, Chen, Q, Li, B, and Liu, XS (2020). TIMER2.0 for analysis of tumor-  
533 infiltrating immune cells. *Nucleic acids research* **48**: W509-w514.
- 534 52. Jiang, P, Gu, S, Pan, D, Fu, J, Sahu, A, Hu, X, Li, Z, Traugh, N, Bu, X, Li, B, *et al.* (2018). Signatures of  
535 T cell dysfunction and exclusion predict cancer immunotherapy response. *Nat Med* **24**: 1550-1558.
- 536 53. Miao, YR, Zhang, Q, Lei, Q, Luo, M, Xie, GY, Wang, H, and Guo, AY (2020). ImmuCellAI: A Unique  
537 Method for Comprehensive T-Cell Subsets Abundance Prediction and its Application in Cancer  
538 Immunotherapy. *Adv Sci (Weinh)* **7**: 1902880.
- 539
- 540

541 **Figure legends**

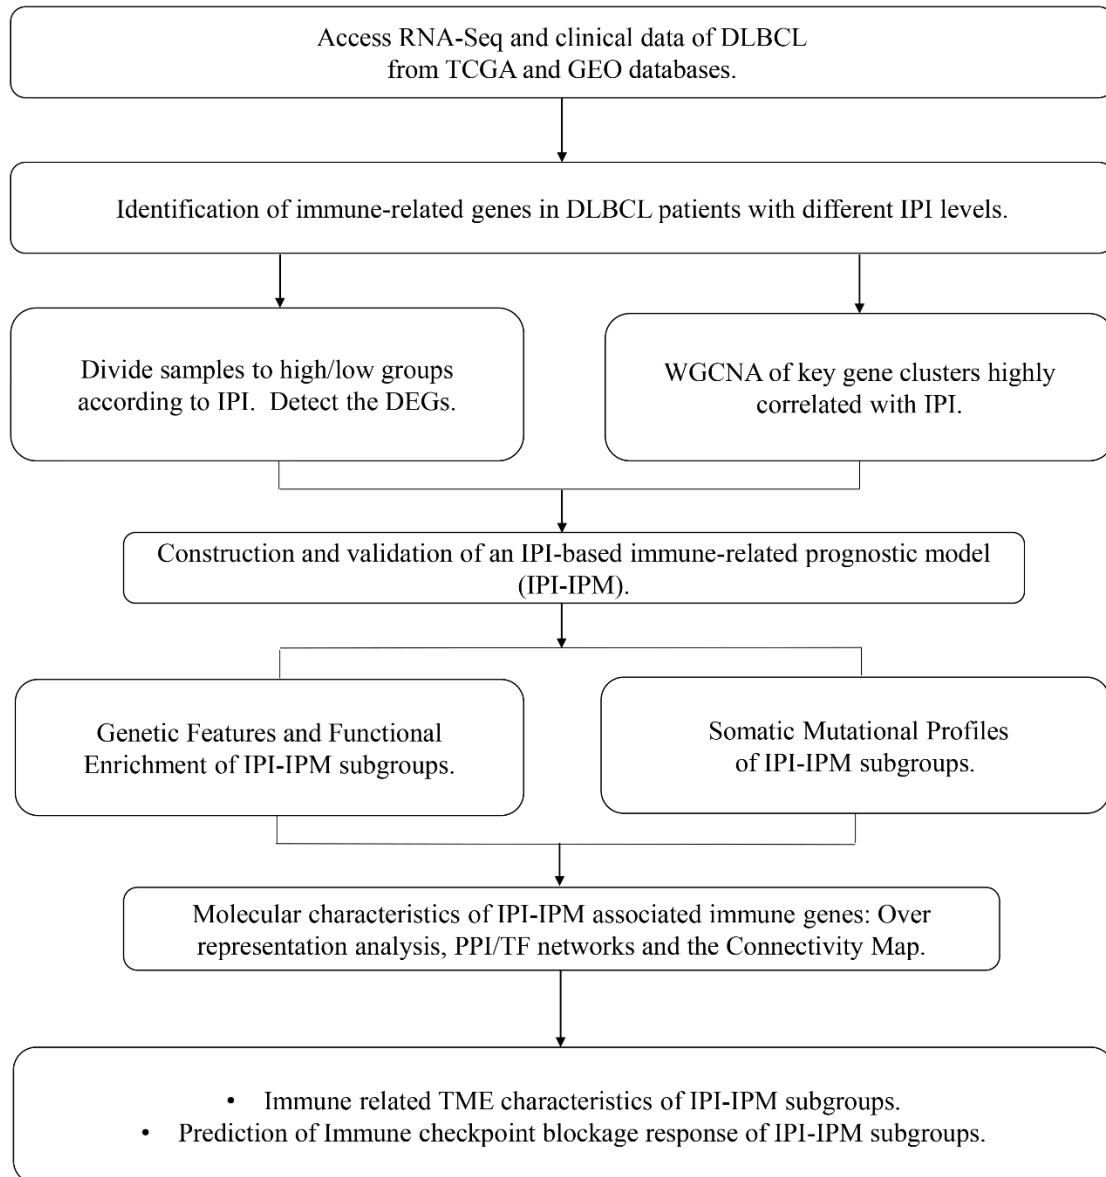

542

543

544

545

**Figure 1.** A flow chart for the process of the present study.



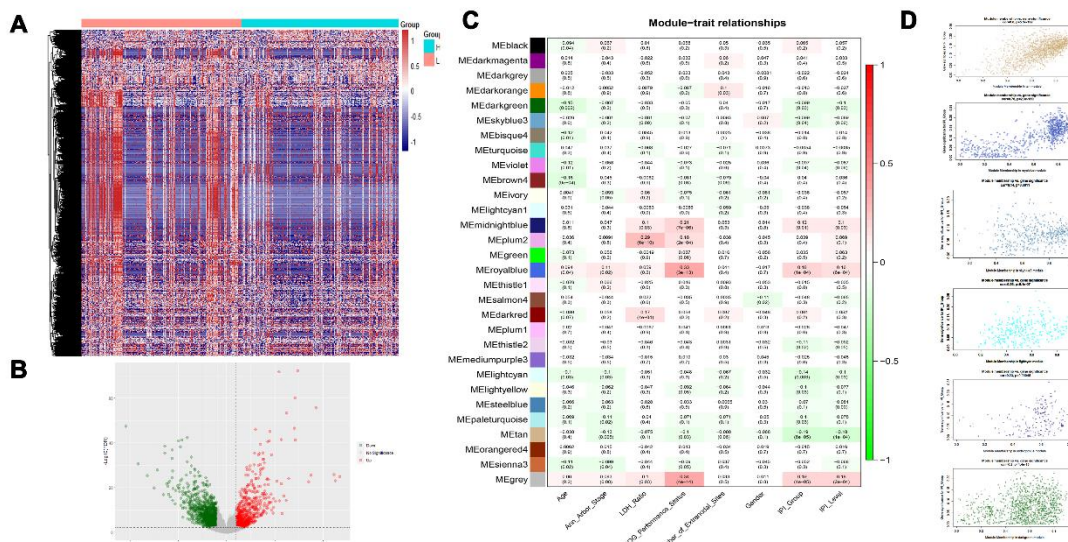

546  
 547 **Figure 2.** Identification of immune-related genes in DLBCL patients with different IPI levels.  
 548 (A-B) Heatmap and volcano plot of differentially expressed genes between the high and low IPI groups. (C-  
 549 D) Identification of IPI related gene clusters using WGCNA: Analysis and visualization of Module-trait  
 550 relationship (C); and Correlation between gene module membership and gene significance for IPI in six  
 551 modules (D).

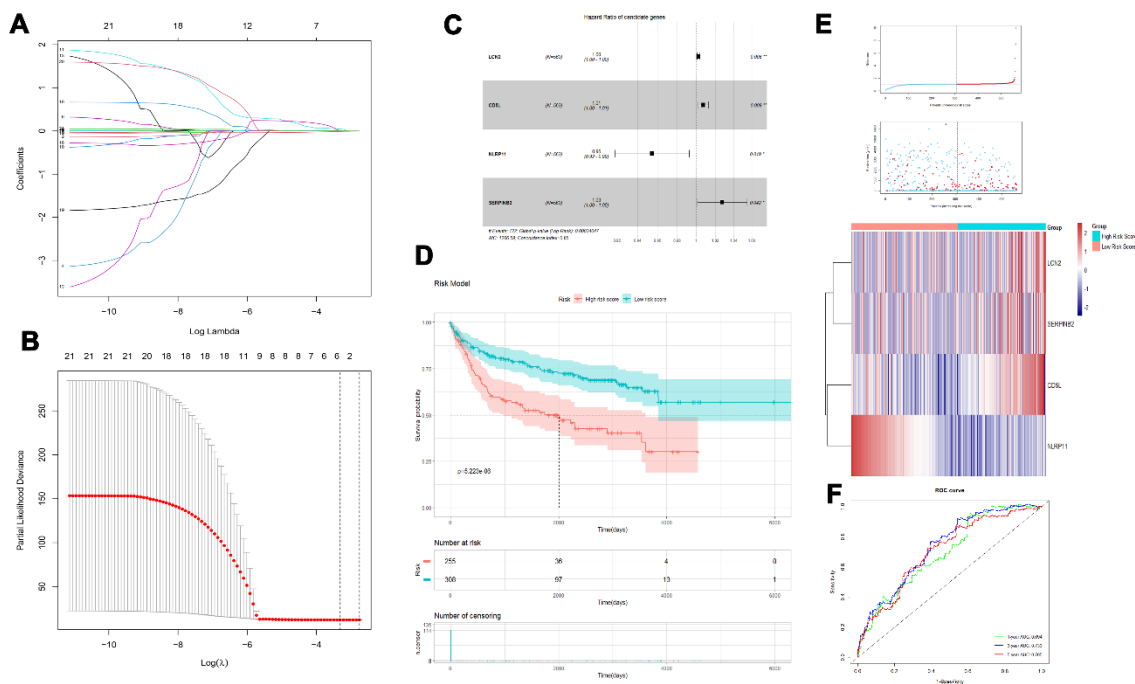

552  
 553 **Figure 3.** Construction and validation of an IPI-based immune-related prognostic model.  
 554 (A and B) Plots of the Lasso penalized Cox regression. (C) A forest plot of the genes that compose the IPI-  
 555 based immune-related prognostic model. (D) Survival analysis of overall survival between high and low IPI-  
 556 IPM risk groups. (E) Risk score, survival status and the gene expression of each patient in high and low IPI-

557 IPM risk groups. (F) time-dependent ROC curves for the IPI-IPM risk score model.

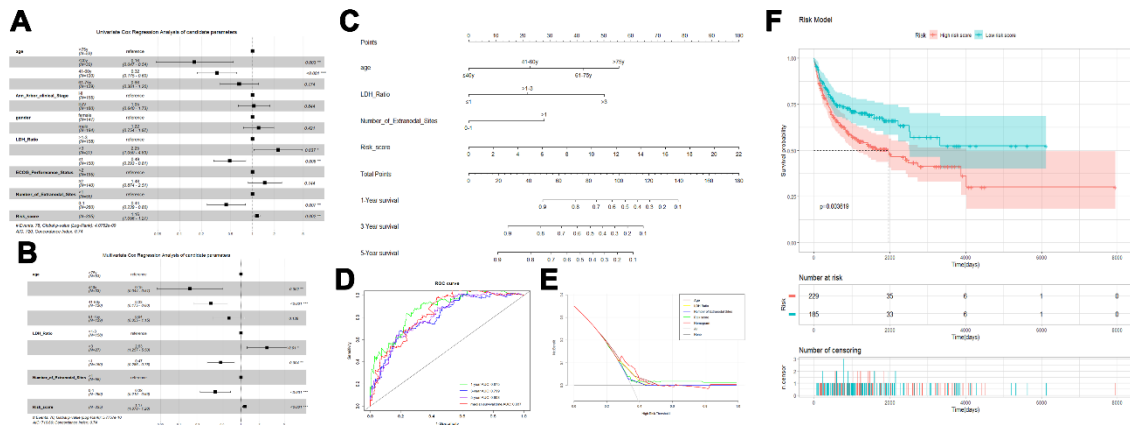

558

559

**Figure 4.** Construction and validation of an IPI-based immune-related nomogram model.

560 (A-B) The univariate analysis and multivariate analysis of IPI-IPM risk score and clinicopathologic

561 parameters. (C) Nomogram for the prediction of the survival probability of 1-, 3-, and 5-year overall survival.

562 (D) time-dependent ROC curves for the Nomogram. (E) The DCA analysis of all parameters in the nomogram.

563 (F) Survival analysis of overall survival between high and low risk groups in the testing (GSE10846) cohort.

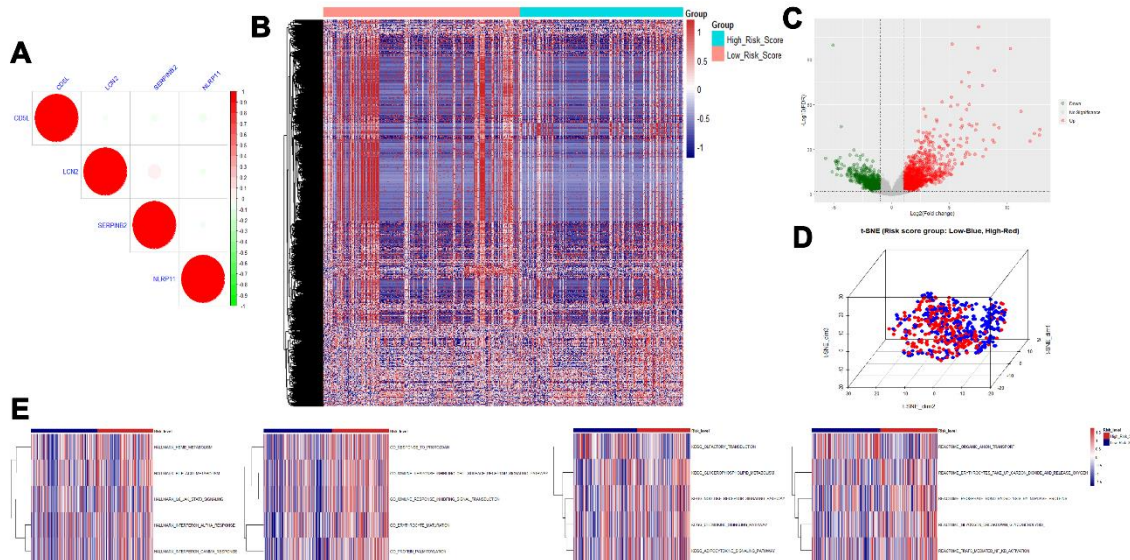

564

565

**Figure 5.** Molecular characteristics of IPI-IPM associated immune genes.

566 (A) Pearson correlation analysis of the genes that compose the IPI-IPM. (B-C) Heatmap and volcano plot of

567 differentially expressed genes between high and low IPI-IPM risk groups. (D) The t-SNE algorithm were

568 applied to show the difference of DLBCL patients between the high and low IPI-IPM risk groups. (E) GSEA

569 heatmaps of IPI-IPM risk groups regarding the Hallmark gene sets, GO biological processes terms, KEGG

570 pathways and Reactome pathways.

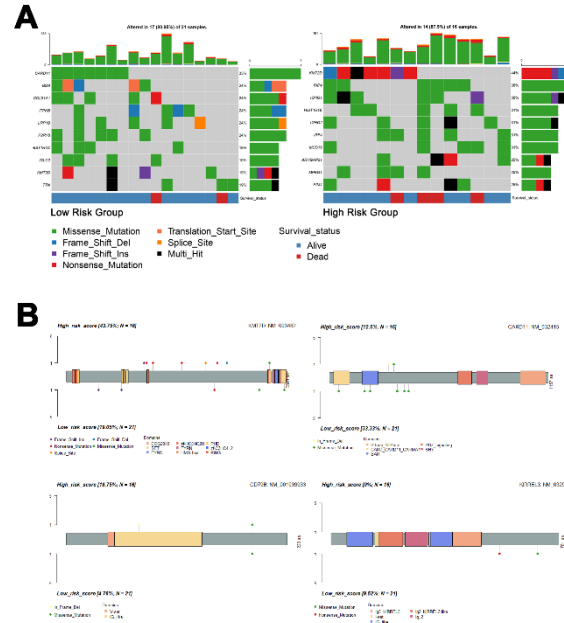

571

572

**Figure 6.** Somatic mutational profiles of IPI-IPM subgroups.

573 (A) Differentially mutated genes between high and low IPI-IPM risk groups. Top 10 Mutated genes (rows)

574 are ordered by mutation rate. Samples (columns) are classified into high and low IPI-IPM risk groups.

575 The color-coding legends indicates the mutation types and survival status of patients. (B) Lollipop plots for

576 amino acid changes of KMT2D, CARD11, CD79B, and KIRREL3.

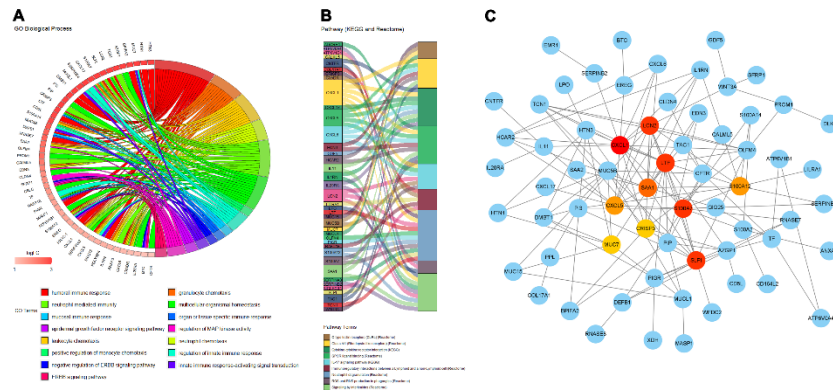

577

578

**Figure 7.** Immune characteristics of IPI-IPM subgroups.

579 (A and B) Over representative analysis: A Chord map of the enriched biological processes (A) and a Sankey

580 plot of the enriched pathways (B); (C) a protein-protein interaction network based on the STRING database.

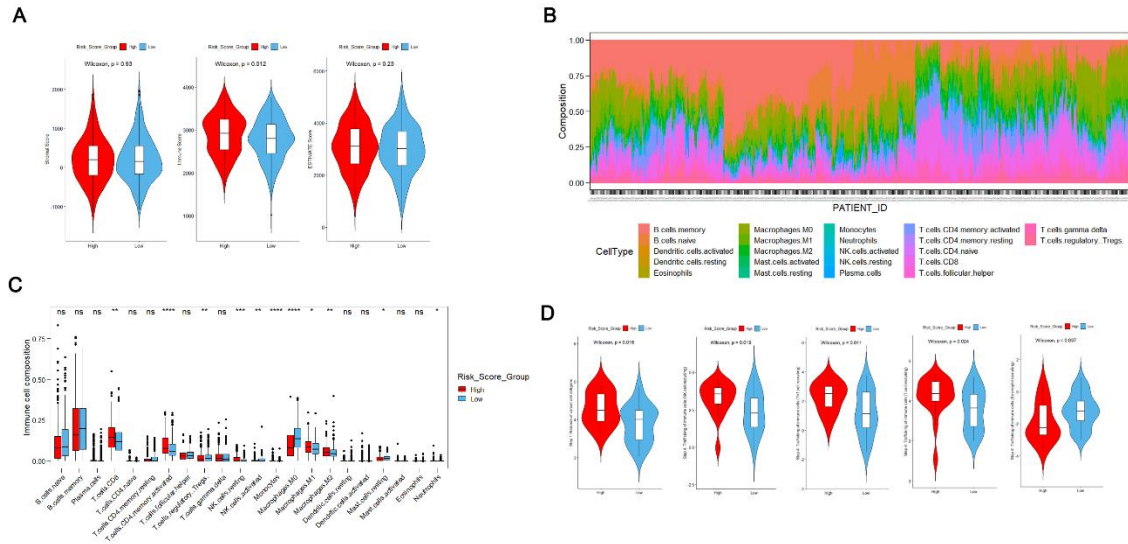

581

582

**Figure 8.** Tumor immune microenvironment (TME) characteristics of IPI-IPM subgroups.

583 (A) Analysis of tumor purity and immune/stromal cells infiltration by using the ESTIMATE algorithm. (B

584 and C) Analysis of immune cells infiltration by using the CIBERSORT algorithm: Relative proportion of

585 each type of cells infiltration in DLBCL patients (B) and a bar plot visualizing significantly differentially

586 infiltrated cells between high and low IPI-IPM risk groups (C). (D) Profile of anticancer immune

587 microenvironment based on the TIP database between high and low IPI-IPM risk groups.

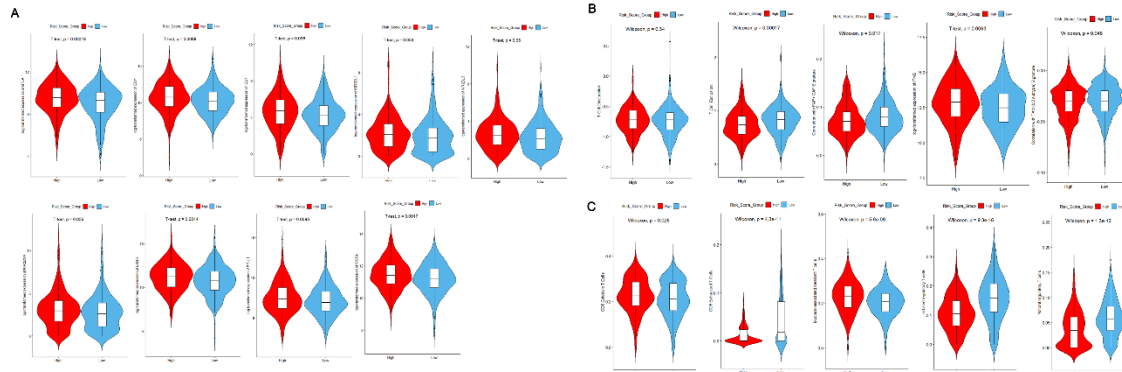

588

589

**Figure 9.** Immune checkpoint blockage (ICB) response prediction of IPI-IPM subgroups.

590 (A) The expression of inhibitory immune checkpoints between high and low IPI-IPM risk groups. (B)

591 Analysis of T cell dysfunction, T cell exclusion, FAP+ CAFs, and IFN- $\gamma$  signature between high and low IPI-

592 IPM risk groups based on TIDE algorithm. (C) Prediction of the infiltration of cytotoxic CD8+ T cells,

593 mucosal-associated invariant T cells, exhausted CD8+ T cells, natural and induced Tregs between high and

594 low IPI-IPM risk groups based on ImmuCellAI database.

595
